# Supplementary material
Source: publisher figshare collection journal article supplement (https://diabetesjournals.figshare.com/ndownloader/files/30929506)
Supplement: Supplementary file 1 [file 30929506]

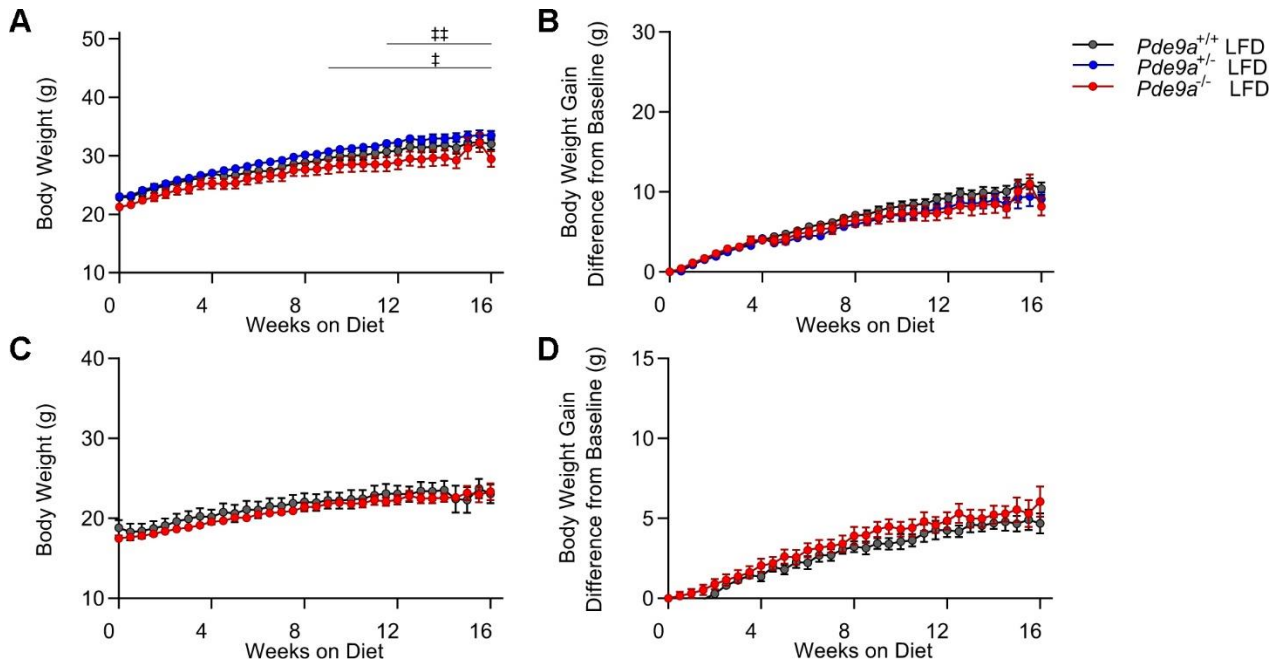

**Supplemental Figure S1. Low fat diet fed *Pde9a*<sup>-/-</sup> mice have no difference in body weight.**

(A) Male *Pde9a*<sup>+/+</sup>, *Pde9a*<sup>+/-</sup>, and *Pde9a*<sup>-/-</sup> mice were fed a LFD for 16 weeks beginning at 6 weeks of age. (B) Body weight gain. (C) Female *Pde9a*<sup>+/+</sup> and *Pde9a*<sup>-/-</sup> mice were fed a LFD for 16 weeks beginning at 6 weeks of age. (D) Body weight gain. For (A-B) N = 10 *Pde9a*<sup>+/+</sup> LFD, 17 *Pde9a*<sup>+/-</sup> LFD, 11 *Pde9a*<sup>-/-</sup> LFD. For (C-D), N = 7 *Pde9a*<sup>+/+</sup> LFD, 17 *Pde9a*<sup>-/-</sup> LFD. Data were analyzed by 2-way ANOVAs with repeated measures. Post-hoc analyses were performed using Sidak's multiple comparisons test for *Pde9a* genotype only and are indicated on figures with  $\ddagger$  comparing *Pde9a*<sup>+/+</sup> vs. *Pde9a*<sup>-/-</sup>. \* or  $\ddagger$ , P < 0.05; \*\* or  $\ddagger\ddagger$ , P < 0.01.

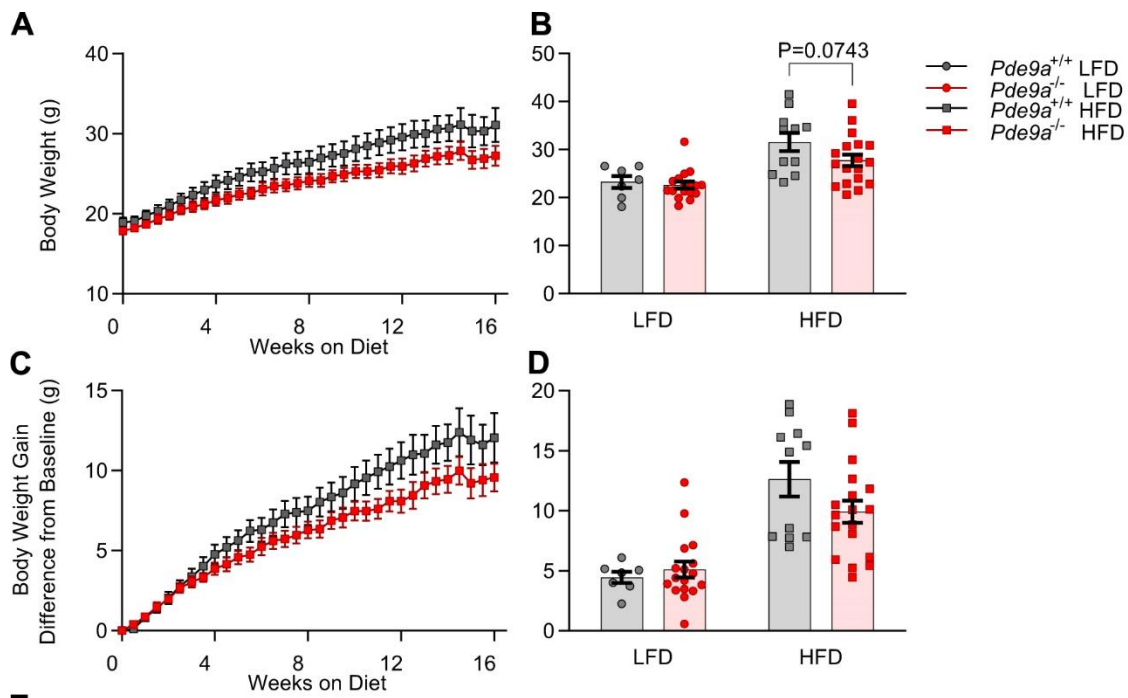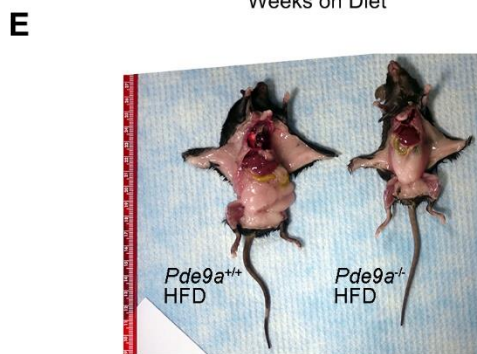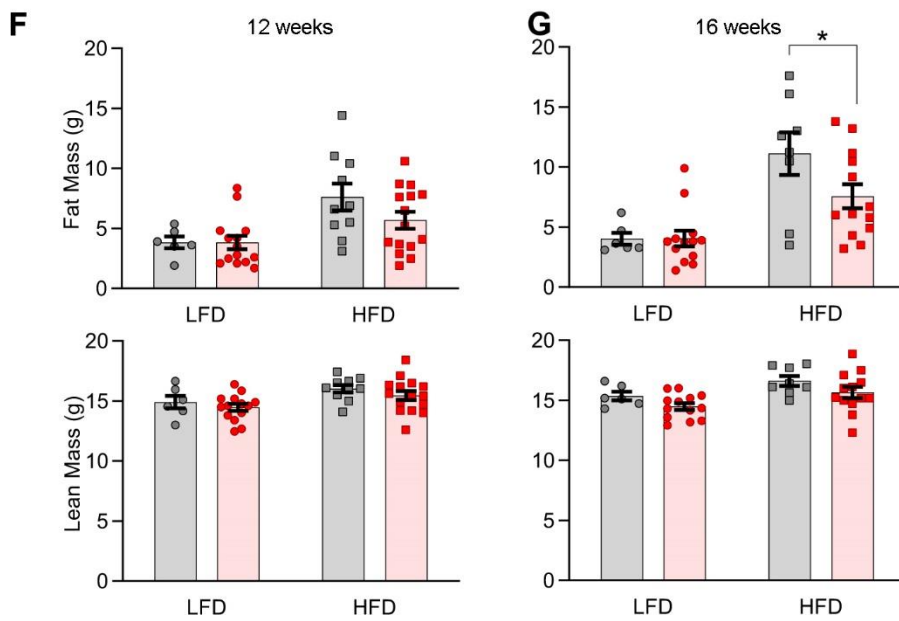

**Supplemental Figure S2. Female *Pde9a*<sup>-/-</sup> mice exhibit a modest protection from high fat diet induced obesity.**

(A) Female *Pde9a*<sup>+/+</sup> and *Pde9a*<sup>-/-</sup> mice were fed a LFD or HFD for 16 weeks beginning at 6 weeks of age. LFD results are in Supplemental Figure S1. ( $P = 0.0003$ , genotype  $\times$  time interaction for HFD) (B) Terminal body weight. (C) Body weight gain. LFD results are in Supplemental Figure S1. ( $P = 0.0003$ , genotype  $\times$  time interaction for HFD) (D) Cumulative body weight gain. (E) Representative images of *Pde9a*<sup>+/+</sup> and *Pde9a*<sup>-/-</sup> littermates that were fed HFD. Body composition at 12- (F) and 16-weeks (G) of HFD feeding. Data are mean  $\pm$  SEM. Analyses were performed using 2-way ANOVA. For (A) and (C), 2-way ANOVAs were performed with repeated measures. Post-hoc analyses were performed using Sidak's multiple comparisons test for *Pde9a* genotype only and are indicated on figures with \*  $P < 0.05$  comparing *Pde9a*<sup>+/+</sup> vs. *Pde9a*<sup>-/-</sup>. For (A-D),  $N = 7$  *Pde9a*<sup>+/+</sup> LFD, 17 *Pde9a*<sup>-/-</sup> LFD, 11 *Pde9a*<sup>+/+</sup> HFD, 18 *Pde9a*<sup>-/-</sup> HFD. For (F-G),  $N = 6$  *Pde9a*<sup>+/+</sup> LFD, 13-14 *Pde9a*<sup>-/-</sup> LFD, 8-10 *Pde9a*<sup>+/+</sup> HFD, 13-15 *Pde9a*<sup>-/-</sup> HFD.

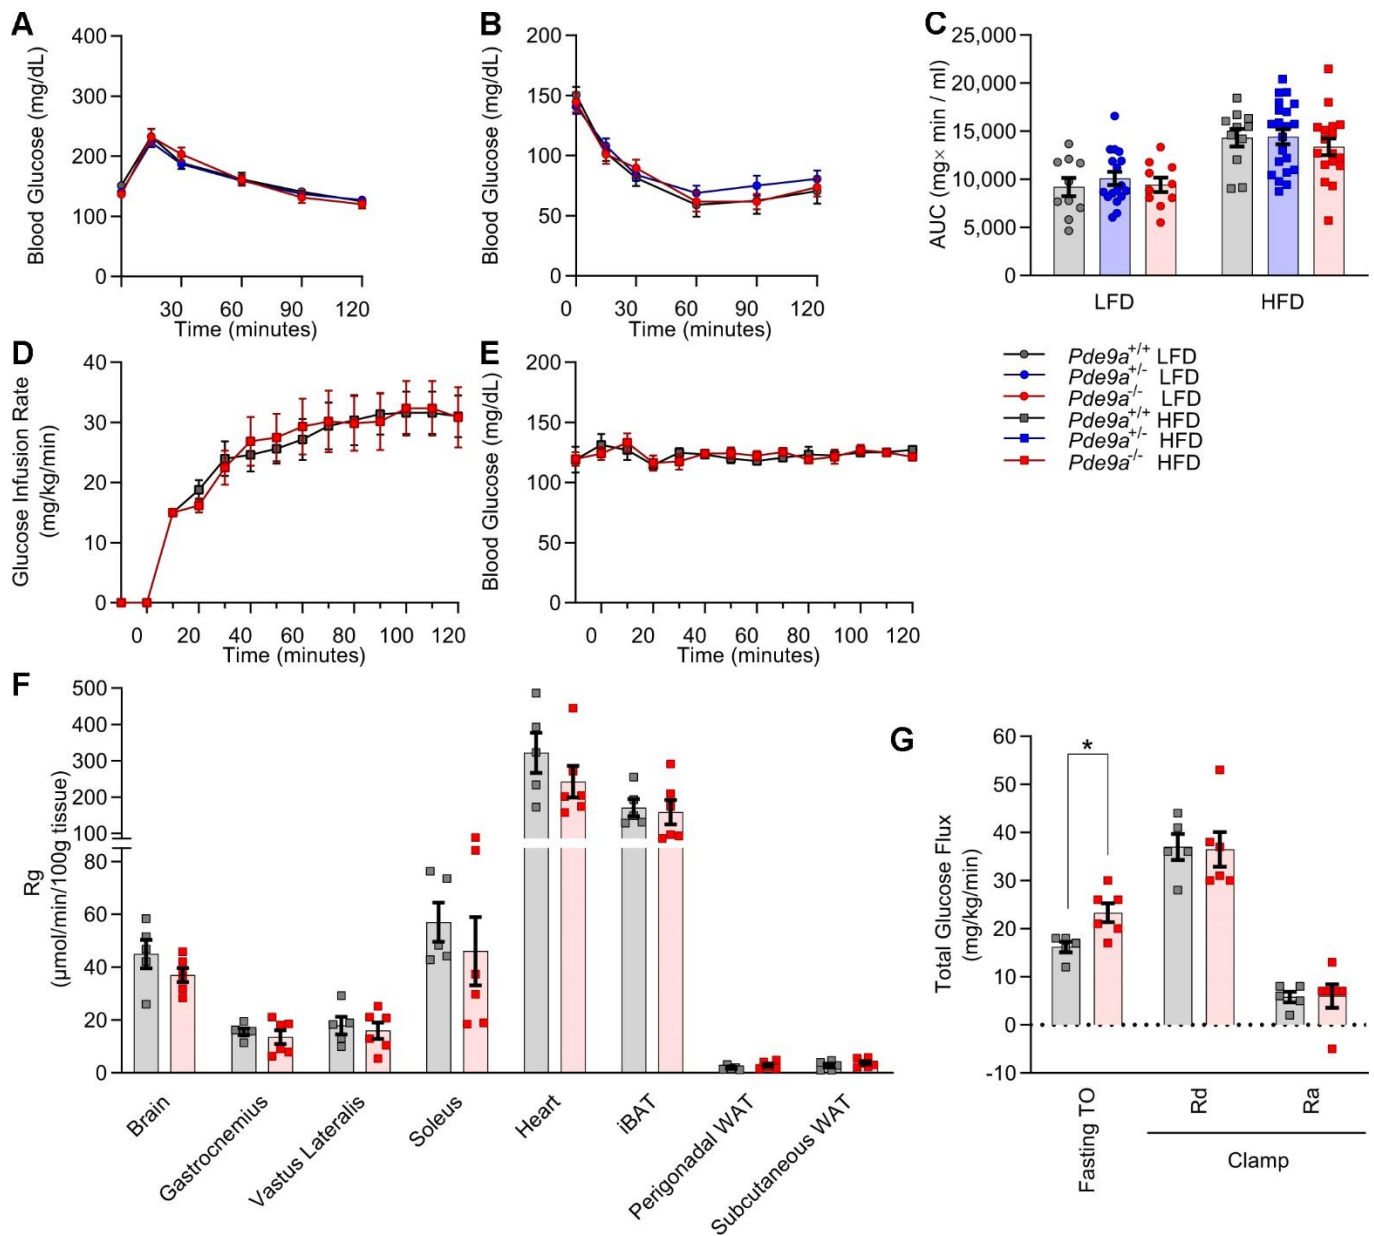

**Supplemental Figure S3. Hyperinsulinemic euglycemic clamps revealed no differences in insulin sensitivity between weight matched *Pde9a*<sup>+/+</sup> and *Pde9a*<sup>-/-</sup> mice.**

(A) IP-GTT in male *Pde9a*<sup>+/+</sup>, *Pde9a*<sup>+/-</sup>, and *Pde9a*<sup>-/-</sup> mice fed LFD for 15 weeks. (B) IP-ITT in male *Pde9a*<sup>+/+</sup>, *Pde9a*<sup>+/-</sup>, and *Pde9a*<sup>-/-</sup> mice fed LFD for 14 weeks. (C) Area under the curve (AUC) of ITT data in Figure 3C and Supplemental Figure 2B. (D) Glucose infusion rate. (E) Blood glucose during the clamp. (F) Tissue [<sup>14</sup>C]2-deoxy-D-glucose uptake (Rg). (G) Fasting glucose turnover rate in *Pde9a*<sup>-/-</sup> mice compared to *Pde9a*<sup>+/+</sup> ( $P = 0.015$ ). Glucose disappearance (Rd) and endogenous glucose production (Ra) during the clamp. Data are mean  $\pm$  SEM. For (A) and (B), analyses was performed using 2-way ANOVA with repeated measures. Post-hoc analyses were performed using Sidak's multiple comparisons test. C and D were analyzed by multiple t-tests with statistical significance determined by the Holm-Sidak method with \*  $P < 0.05$ .  $N = 5$  *Pde9a*<sup>+/+</sup> HFD, 6 *Pde9a*<sup>-/-</sup> HFD.

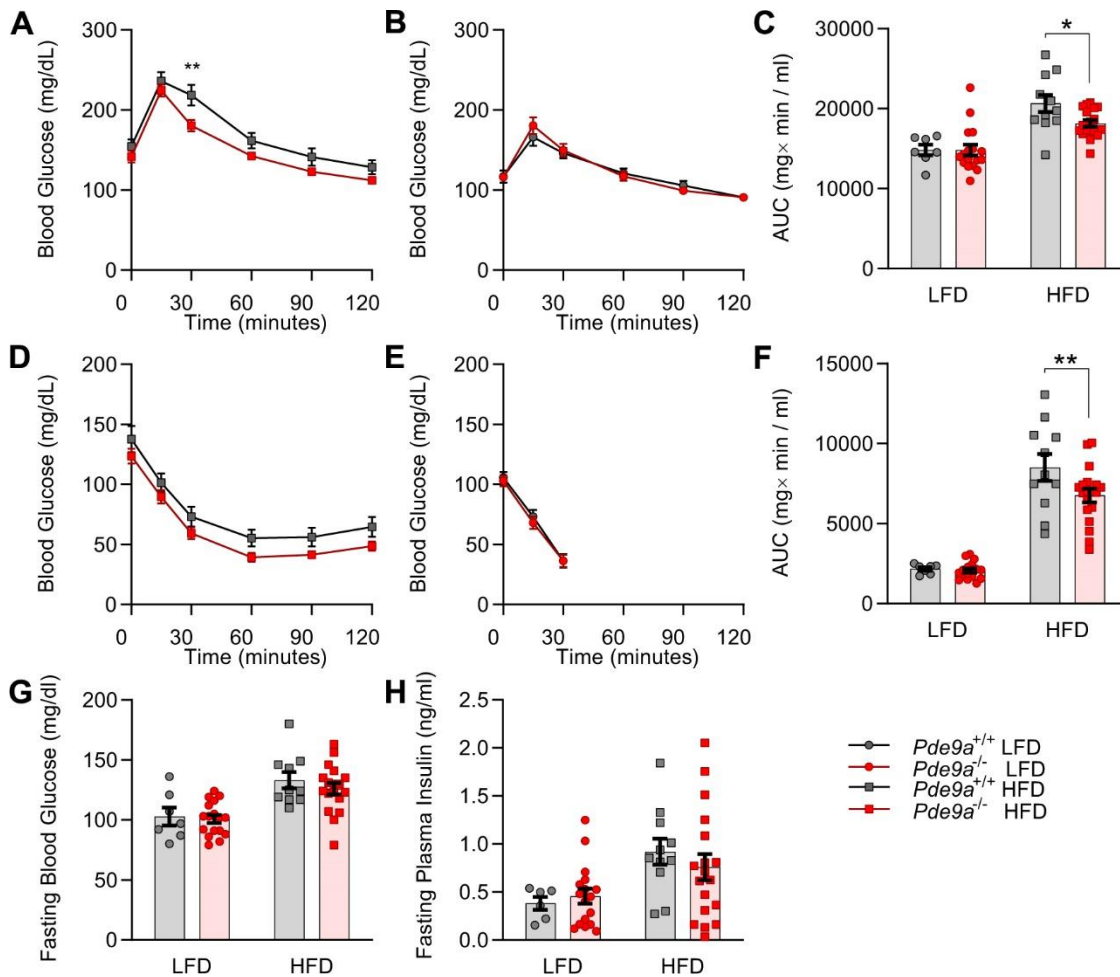

**Supplemental Figure S4. Female *Pde9a*<sup>-/-</sup> mice have modest improvements in glucose homeostasis.**

IP-GTT in female *Pde9a*<sup>+/+</sup> and *Pde9a*<sup>-/-</sup> mice fed either HFD (A) ( $P = 0.022$  effect of genotype) or LFD (B) for 15 weeks. (C) Area under the curve (AUC) of data in (A) and (B). IP-ITT in female *Pde9a*<sup>+/+</sup> and *Pde9a*<sup>-/-</sup> mice fed either HFD (D) ( $P = 0.059$  effect of genotype) or LFD (E) for 14 weeks. (F) Area under the curve (AUC) of data in (D) and (E). Five-hour fasting (G) glucose and (H) insulin at the end of the study. Data are mean  $\pm$  SEM. For (A, B, D, and E), 2-way ANOVAs were performed with repeated measures. For (C, G, and H), analyzed by 2-way ANOVA. (F) was analyzed by multiple t-tests. Post-hoc analyses were performed using Sidak's multiple comparisons test for *Pde9a* genotype only and are indicated on figures with \*  $P < 0.05$ , \*\*  $P < 0.01$  comparing *Pde9a*<sup>+/+</sup> vs. *Pde9a*<sup>-/-</sup>.  $N = 7$  *Pde9a*<sup>+/+</sup> LFD, 17 *Pde9a*<sup>-/-</sup> LFD, 11 *Pde9a*<sup>+/+</sup> HFD, 18 *Pde9a*<sup>-/-</sup> HFD.

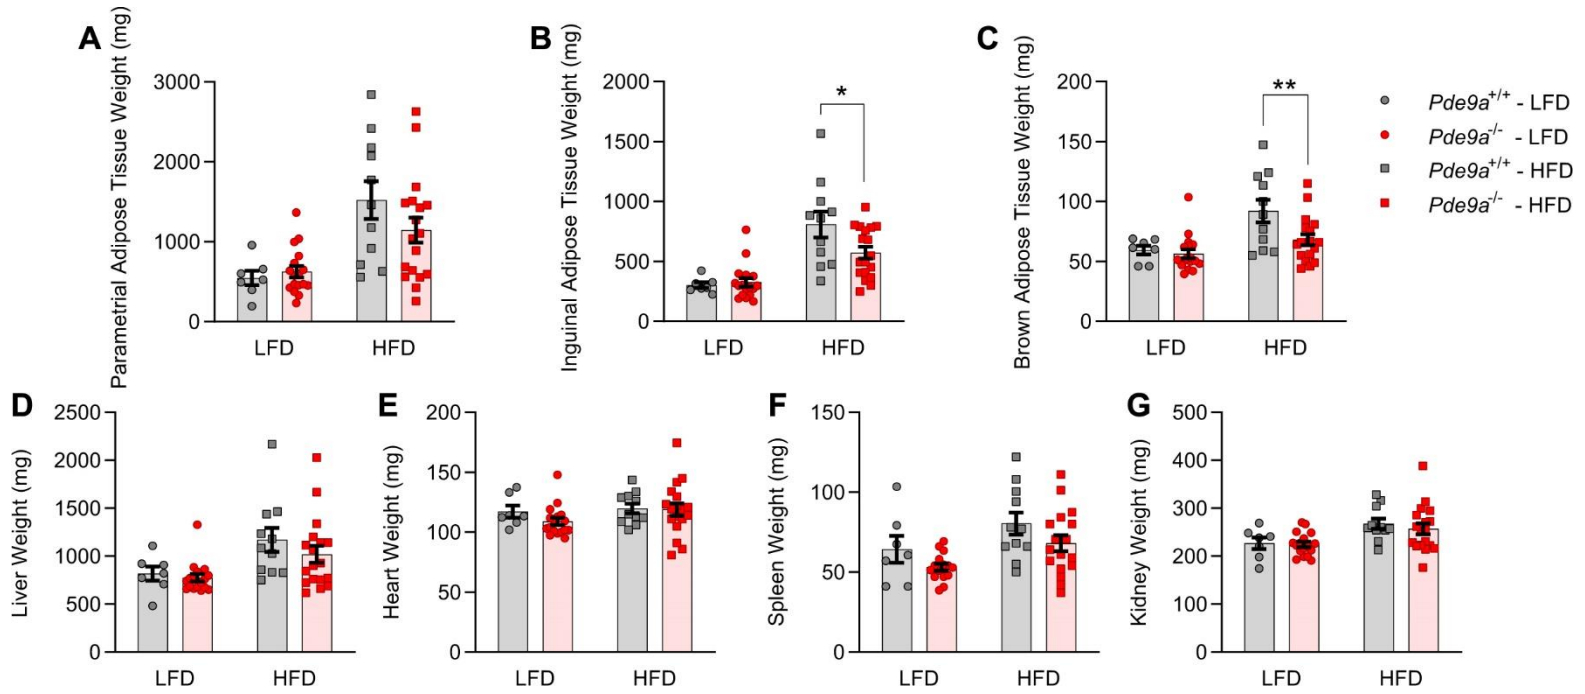

**Supplemental Figure S5.  $Pde9a^{-/-}$  female mice have reduce inguinal and brown adipose tissue weight.**

(A) Parametrial WAT weights. (B) iWAT weights ( $P = 0.052$ , effect of genotype $\times$ diet interaction). (C) iBAT weights ( $P = 0.030$ , effect of genotype). (D) Liver weights. (E) Heart weights. (F) Spleen weights ( $P = 0.040$ , effect of genotype). (G) Kidney weights. Data are mean  $\pm$  SEM. Analyses were performed using 2-way ANOVA. Post-hoc analyses were performed using Sidak's multiple comparisons test for  $Pde9a$  genotype only and are indicated on figures with \*  $P < 0.05$ , \*\*  $P < 0.01$  comparing  $Pde9a^{+/+}$  vs.  $Pde9a^{-/-}$ .  $N = 7$   $Pde9a^{+/+}$  LFD, 17  $Pde9a^{-/-}$  LFD, 11  $Pde9a^{+/+}$  HFD, 18  $Pde9a^{-/-}$  HFD.

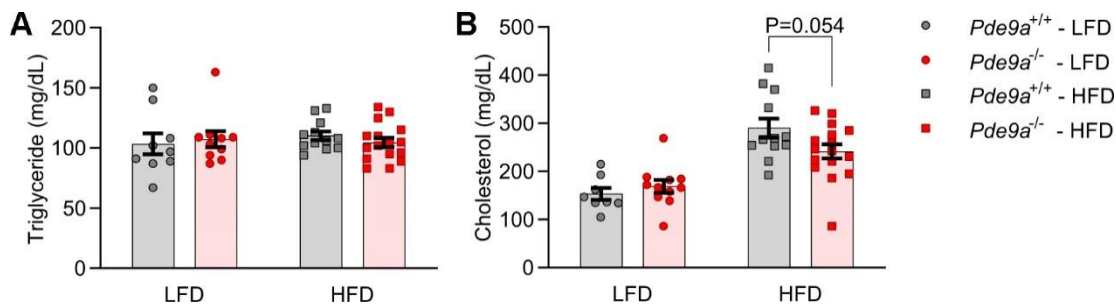

**Supplemental Figure S6. Effect of PDE9 on circulating plasma lipids in  $Pde9a^{+/+}$  and  $Pde9a^{-/-}$  mice.**

(A) Triglyceride concentrations in plasma from 5-hour fasted mice. (B) Cholesterol concentrations in plasma from 5-hour fasted mice. HFD fed  $Pde9a^{+/+}$  vs.  $Pde9a^{-/-}$  mice ( $P = 0.0621$ , effect of genotype $\times$ diet interaction). Data are mean  $\pm$  SEM. Analyses were performed using 2-way ANOVA. Post-hoc analyses were performed using Sidak's multiple comparisons test for  $Pde9a$  genotype only and are indicated on figures.  $N = 9$   $Pde9a^{+/+}$  LFD, 12  $Pde9a^{-/-}$  LFD, 11  $Pde9a^{+/+}$  HFD, 16  $Pde9a^{-/-}$  HFD.

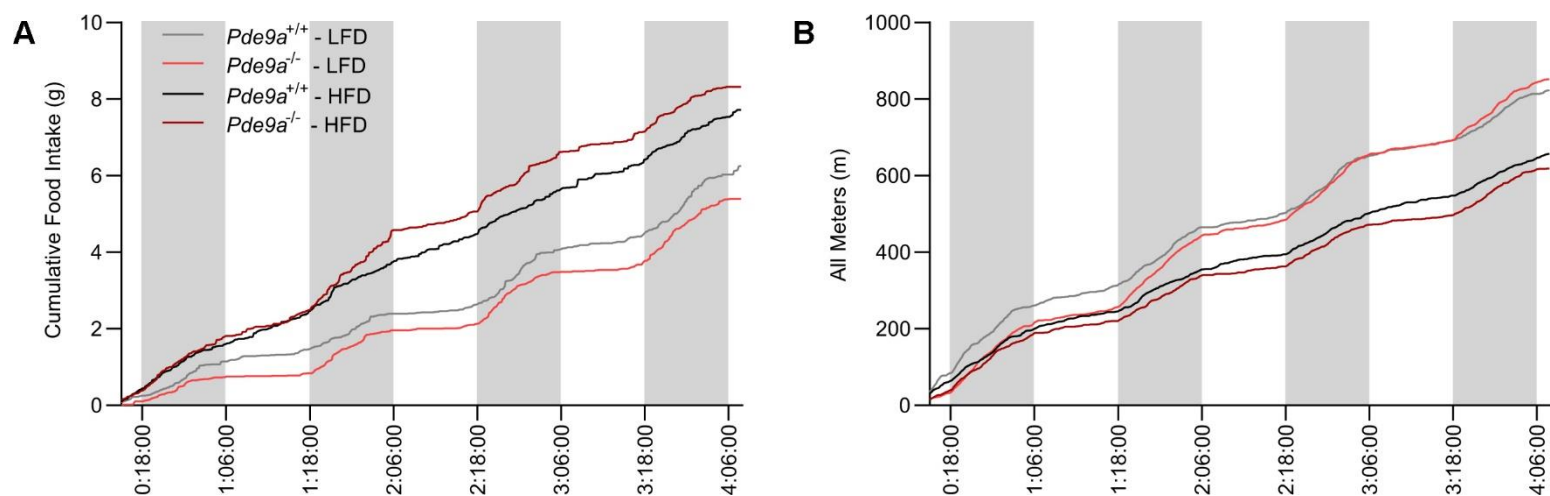

**Supplemental Figure S7. Food intake and physical activity.**

(A) Cumulative food intake. (B) Cumulative fine and locomotor movement. Values in figure are the mean only from the Promethion System. N = 6  $Pde9a^{+/+}$  LFD, 7  $Pde9a^{-/-}$  LFD, 9  $Pde9a^{+/+}$  HFD, 8  $Pde9a^{-/-}$  HFD.



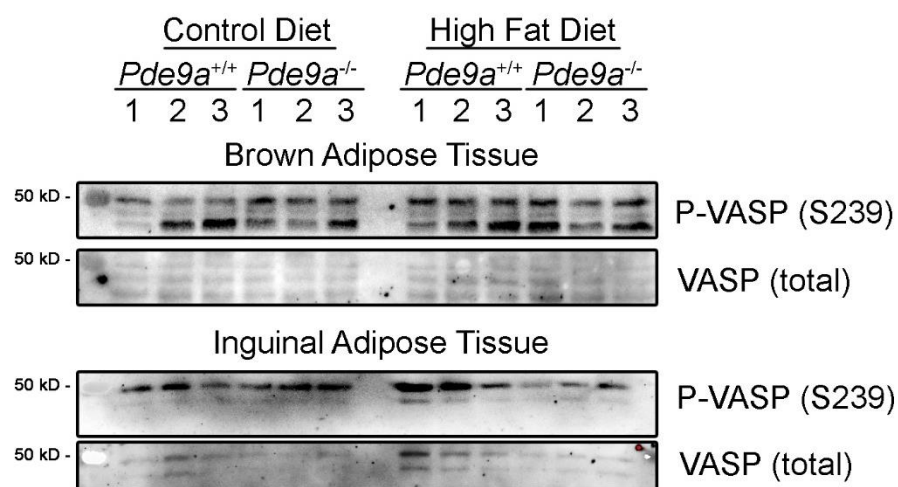

**Supplemental Figure S8. VASP<sup>(S239)</sup> phosphorylation is not altered under basal conditions**  
P-VASP at Ser<sup>239</sup> Western blot from male iBAT and iWAT.

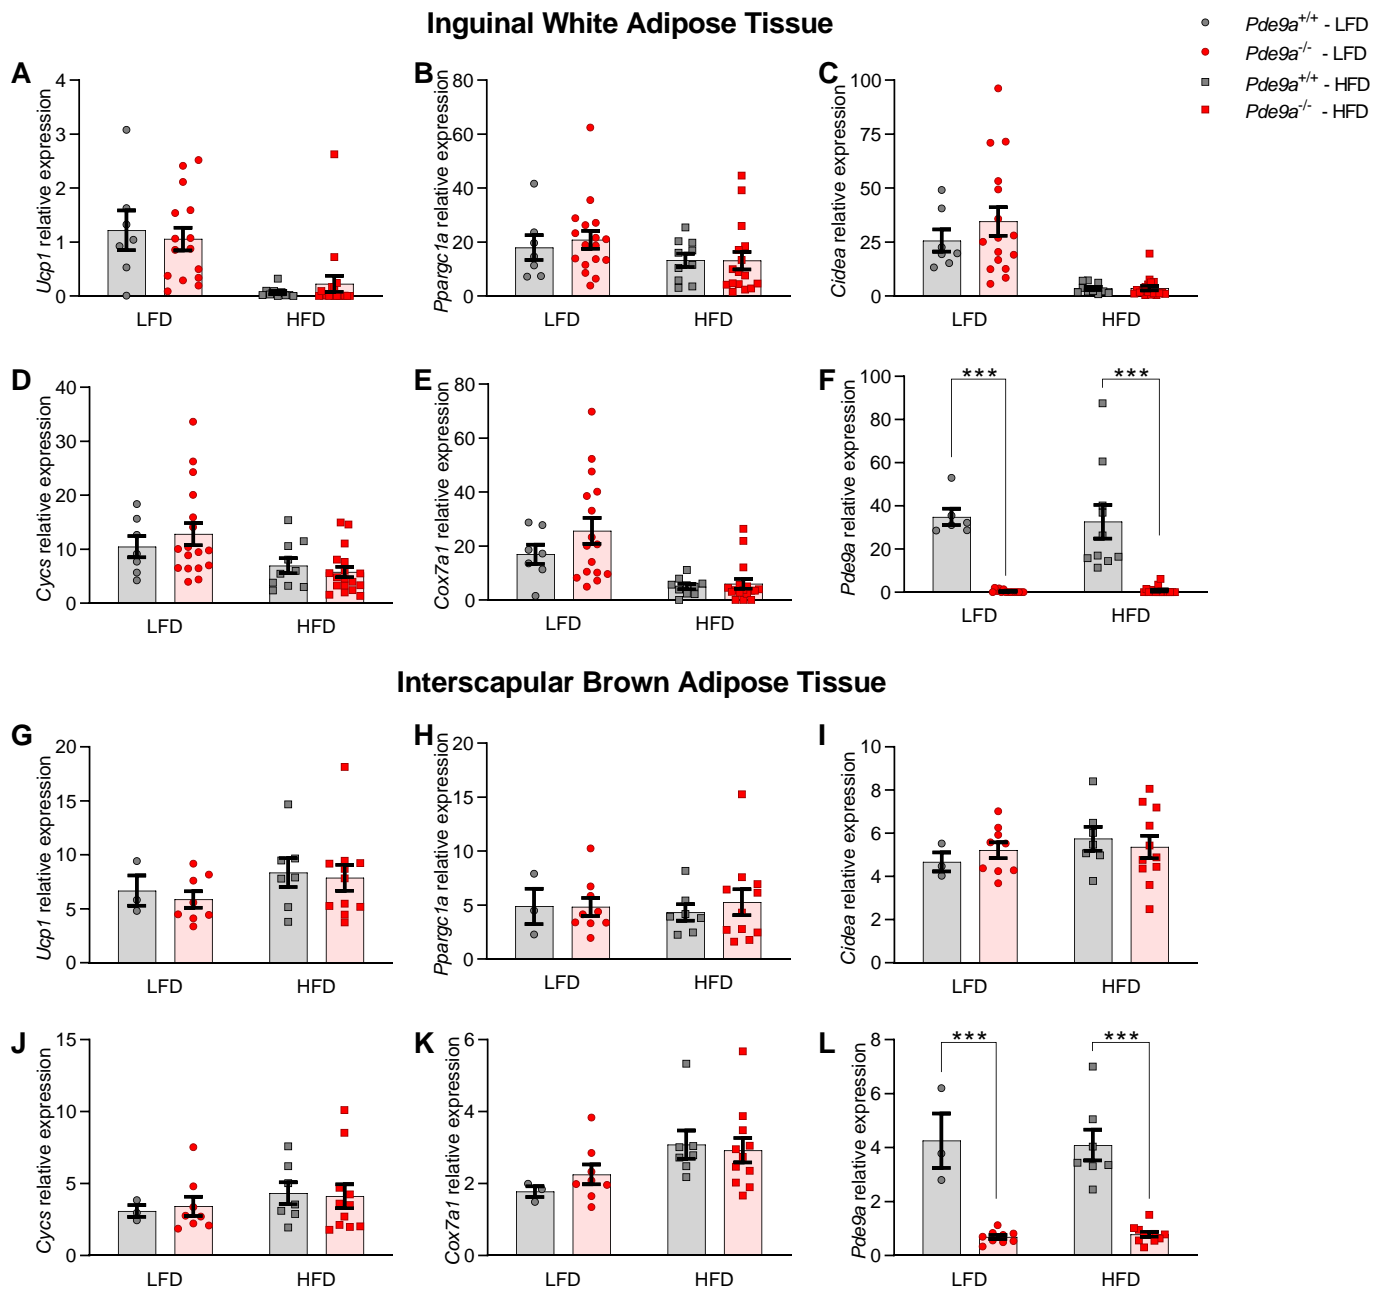

**Supplemental Figure S9. Female *Pde9a*<sup>-/-</sup> mice have unchanged adipose tissue thermogenic gene expression.** The iWAT expression of (A) *Ucp1* (B) *Pparg1a* (C) *Cidea* (D) *Cyts* (E) *Cox7a1* and (F) *Pde9a* and the iBAT expression of (G) *Ucp1* (H) *Pparg1a* (I) *Cidea* (J) *Cyts* (K) *Cox7a1* and (L) *Pde9a* by qRT-PCR. Data are mean  $\pm$  SEM. Analyses were performed using 2-way ANOVA. Post-hoc analyses were performed using Sidak's multiple comparisons test for *Pde9a* genotype only and are indicated on figures with \*\*\*  $P < 0.001$  comparing *Pde9a*<sup>+/+</sup> vs. *Pde9a*<sup>-/-</sup>. For iWAT, N = 6-7 *Pde9a*<sup>+/+</sup> LFD, 15-17 *Pde9a*<sup>-/-</sup> LFD, 10 *Pde9a*<sup>+/+</sup> HFD, 16-18 *Pde9a*<sup>-/-</sup> HFD. For iBAT, N = 3 *Pde9a*<sup>+/+</sup> LFD, 8-9 *Pde9a*<sup>-/-</sup> LFD, 7 *Pde9a*<sup>+/+</sup> HFD, 11 *Pde9a*<sup>-/-</sup> HFD.

| <b><u>Reagent</u></b>                                                | <b><u>Final Concentration</u></b> | <b><u>Source</u></b>  | <b><u>Product Code</u></b>     |
|----------------------------------------------------------------------|-----------------------------------|-----------------------|--------------------------------|
|                                                                      |                                   |                       |                                |
| <b><u>Chemicals</u></b>                                              |                                   |                       |                                |
| PF-04447943                                                          |                                   | MedChem Express       | HY-15441                       |
| ANP (1-28)                                                           |                                   | AnaSpec Inc.          | AS-20648                       |
| BNP                                                                  |                                   | ProSpec               | CYT-369-B                      |
| BAY 73-6691                                                          |                                   | Sigma                 | B3561                          |
| CL-316,243                                                           |                                   | American Cyanamid Co. | gift from Elliott Danforth Jr. |
| Isoproterenol                                                        |                                   | Sigma                 | I6504                          |
| pCPT-cGMP                                                            |                                   | Sigma                 | C5438                          |
|                                                                      |                                   |                       |                                |
| <b><u>Kits</u></b>                                                   |                                   |                       |                                |
| Mouse Insulin ELISA                                                  |                                   | Mercodia              | 10-1247-01                     |
|                                                                      |                                   |                       |                                |
| <b><u>Cell Culture</u></b>                                           |                                   |                       |                                |
| <b><u>IngJ6 and Bat8 Growth Medium</u></b>                           |                                   |                       |                                |
| DMEM/F12 GlutaMAX™                                                   |                                   | ThermoFisher          | 10565018                       |
| FBS                                                                  | 15%                               |                       |                                |
| HEPES                                                                | 2 mM                              |                       |                                |
| penicillin and streptomycin                                          | 50 units/ml                       |                       |                                |
|                                                                      |                                   |                       |                                |
| <b><u>IngJ6 and Bat8 Differentiation Medium</u></b>                  |                                   | days 1-4              |                                |
| DMEM/F12 GlutaMAX™                                                   |                                   | ThermoFisher          | 10565018                       |
| FBS                                                                  | 10%                               |                       |                                |
| dexamethasone                                                        | 5 mM                              |                       |                                |
| Insulin                                                              | 0.5 mg/ml                         |                       |                                |
| isobutylmethylxanthine (IBMX)                                        | 0.5 mM                            |                       |                                |
| rosiglitazone                                                        | 1 mM                              |                       |                                |
| T3                                                                   | 1 nM                              |                       |                                |
|                                                                      |                                   |                       |                                |
| <b><u>IngJ6 and Bat8 Post-differentiation Maintenance Medium</u></b> |                                   | days 5-8              |                                |
| DMEM/F12 GlutaMAX™                                                   |                                   | ThermoFisher          | 10565018                       |
| FBS                                                                  | 10%                               |                       |                                |
| Insulin                                                              | 0.5 mg/ml                         |                       |                                |
| T3                                                                   | 1 nM                              |                       |                                |
|                                                                      |                                   |                       |                                |
| <b><u>hMADS Growth Medium</u></b>                                    |                                   |                       |                                |
| DMEM, low glucose                                                    |                                   | Lonza                 | 12-707F                        |
| FBS                                                                  | 10%                               |                       |                                |
| L-glutamine                                                          | 2 mM                              |                       |                                |
| HEPES                                                                | 10 mM                             |                       |                                |

|                                                             |                             |                           |            |
|-------------------------------------------------------------|-----------------------------|---------------------------|------------|
| human FGF-2                                                 | 2.5 ng/ml                   | Shenandoah Biotechnology  | 100-146    |
| penicillin and streptomycin                                 | 50 units/ml                 |                           |            |
|                                                             |                             |                           |            |
| <b><u>hMADS Differentiation Medium</u></b>                  |                             | days 1-9                  |            |
| DMEM/F12                                                    |                             | Gibco                     | 11039-021  |
| Dexamethasone                                               | 1 $\mu$ M                   |                           |            |
| IBMX                                                        | 0.5 $\mu$ M                 |                           |            |
| T3                                                          | 0.2 nM                      |                           |            |
| insulin                                                     | 5 $\mu$ g/ml                |                           |            |
| Rosiglitazone                                               | 1 $\mu$ M                   |                           |            |
| transferrin                                                 | 10 $\mu$ g/ml               |                           |            |
|                                                             |                             |                           |            |
| <b><u>hMADS Post-differentiation Maintenance Medium</u></b> |                             | days 10-12                |            |
| DMEM/F12                                                    |                             | Gibco                     | 11039-021  |
| T3                                                          | 0.2 nM                      |                           |            |
| insulin                                                     | 5 $\mu$ g/ml                |                           |            |
| Rosiglitazone                                               | 1 $\mu$ M                   |                           |            |
| transferrin                                                 | 10 $\mu$ g/ml               |                           |            |
|                                                             |                             |                           |            |
| <b><u>hMADS Post-differentiation Basic Medium</u></b>       |                             | days 13-16                |            |
| DMEM/F12                                                    |                             | Gibco                     | 11039-021  |
| insulin                                                     | 5 $\mu$ g/ml                |                           |            |
| transferrin                                                 | 10 $\mu$ g/ml               |                           |            |
|                                                             |                             |                           |            |
| <b><u>Western Blotting Lysis Buffer</u></b>                 |                             |                           |            |
| HEPES                                                       | 25 mM                       |                           |            |
| NaCl                                                        | 150 mM                      |                           |            |
| EDTA                                                        | 5 mM                        |                           |            |
| EGTA                                                        | 5 mM                        |                           |            |
| glycerophosphate                                            | 5 mM                        |                           |            |
| Triton X-100                                                | 0.9%                        |                           |            |
| IGEPAL                                                      | 0.1%                        |                           |            |
| sodium pyrophosphate                                        | 5 mM                        |                           |            |
| glycerol                                                    | 10%                         |                           |            |
| cOmplete™ protease inhibitor cocktail                       | 1 tablet/10 ml Lysis Buffer | Roche                     | 4693124001 |
| PhoSTOP phosphatase inhibitors                              | 1 tablet/10 ml Lysis Buffer | Roche                     | 4906845001 |
|                                                             |                             |                           |            |
| <b><u>Antibodies</u></b>                                    |                             |                           |            |
| AKT                                                         | 1:1000                      | Cell Signaling Technology | 9272       |

|                                                        |         |                           |                  |
|--------------------------------------------------------|---------|---------------------------|------------------|
| P-AKT(S473)                                            | 1:1000  | Cell Signaling Technology | 4060             |
| VASP                                                   | 1:1000  | Cell Signaling Technology | 3132             |
| P-VASP(S293)                                           | 1:1000  | Cell Signaling Technology | 3114             |
| β-actin                                                | 1:2000  | Cell Signaling Technology | 4967             |
| UCP1 (Western Blot)                                    | 1:1000  | Abcam                     | ab23841          |
| UCP1 (IHC)                                             |         | Abcam                     | ab10983          |
| Goat Anti-Rabbit IgG –Alkaline Phosphatase             | 1:20000 | MilliporeSigma            | A3687            |
|                                                        |         |                           |                  |
| <b><u>RNA Purification and Quantitative RT-PCR</u></b> |         |                           |                  |
| Trizol Reagent                                         |         | Ambion                    | 15596018         |
| Zymo-Spin IIICG Column                                 |         | Zymo Research             | C1006-250-G      |
| RNA Prep Buffer                                        |         | Zymo Research             | R1060-2-100      |
| RNA Wash Buffer                                        |         | Zymo Research             | R1003-3-48       |
| High-Capacity cDNA Reverse Transcription Kit           |         | Applied Biosystems        | 4368814          |
| PowerUp SYBR Green Master Mix                          |         | Applied Biosystems        | A25742           |
|                                                        |         |                           |                  |
| <b><u>GTT and ITT</u></b>                              |         |                           |                  |
| 0.9% Saline                                            |         | Hospira, Inc.             | NDC 0409-7138-09 |
| dextrose 50%                                           |         | Agri Laboratories         | NDC 57561-801-50 |
| Insulin (Humulin R)                                    |         | Lilly                     | HI-213           |
|                                                        |         |                           |                  |
| <b><u>Oroboros Buffers and Reagents</u></b>            |         |                           |                  |
|                                                        |         |                           |                  |
| <b><u>Malate 0.4 M</u></b>                             |         |                           |                  |
| Malic Acid                                             | 400 mM  | Sigma                     | M1000            |
| ph 7.0 with KOH                                        |         |                           |                  |
|                                                        |         |                           |                  |
| <b><u>Pyruvate 1 M</u></b>                             |         |                           |                  |
| Sodium Pyruvate                                        | 1 M     | Sigma                     | P2256            |
|                                                        |         |                           |                  |
| <b><u>ADP 0.5 M</u></b>                                |         |                           |                  |
| ADP                                                    | 500 mM  | Alfa Aesar                | L14029           |
| MgCl <sub>2</sub> •6H <sub>2</sub> O                   | 300 mM  | Fisher                    | BP214            |
| ph 7.0 with KOH                                        |         |                           |                  |
|                                                        |         |                           |                  |
| <b><u>Succinate 1M</u></b>                             |         |                           |                  |
| Succinic Acid                                          | 1 M     | TCI                       | S0100            |
| ph 7.0                                                 |         |                           |                  |

|                                                       |                   |            |          |
|-------------------------------------------------------|-------------------|------------|----------|
|                                                       |                   |            |          |
| <b><u>100 mM K<sub>2</sub>EGTA buffer</u></b>         |                   |            |          |
| EGTA                                                  | 100 mM            | Sigma      | E4378    |
| KOH                                                   | 200 mM            | Fisher     | P250     |
| ph 7.0 with KOH                                       |                   |            |          |
|                                                       |                   |            |          |
| <b><u>100 mM CaK<sub>2</sub>EGTA buffer</u></b>       |                   |            |          |
| CaCO <sub>3</sub>                                     | 100 mM            | Sigma      | 795445   |
| EGTA                                                  | 100 mM            | Sigma      | E4378    |
| KOH                                                   | 200 mM            | Fisher     | P250     |
| ph 7.0 with KOH                                       |                   |            |          |
|                                                       |                   |            |          |
| <b><u>Biopsy Preservation Solution: BIOPS</u></b>     |                   |            |          |
| CaK <sub>2</sub> EGTA buffer                          | 2.77 mM           |            |          |
| K <sub>2</sub> EGTA buffer                            | 7.23 mM           |            |          |
| Na <sub>2</sub> ATP                                   | 5.77 mM           | Sigma      | A2383    |
| MgCl <sub>2</sub> •6H <sub>2</sub> O                  | 6.56 mM           | Fisher     | BP214    |
| Taurine                                               | 20 mM             | Sigma      | T0625    |
| Na <sub>2</sub> Phosphocreatine                       | 15 mM             | Sigma      | P7936    |
| Imidazole                                             | 20 mM             | Sigma      | 56750    |
| Dithiothreitol                                        | 0.5 mM            | Sigma      | D9779    |
| MES hydrate                                           | 50 mM             | Sigma      | M8250    |
| Fatty Acid Free BSA                                   | 0.1%              | Calbiochem | 126575   |
| ph 7.1 with KOH                                       |                   |            |          |
|                                                       |                   |            |          |
| <b><u>BIOPS+Saponin</u></b>                           |                   |            |          |
| Saponin                                               | 50 ng/ml in BIOPS | Sigma      | S7900    |
|                                                       |                   |            |          |
| <b><u>Mitochondrial Respiration Medium: MiR05</u></b> |                   |            |          |
| EGTA                                                  | 0.5 mM            | Sigma      | E4378    |
| MgCl <sub>2</sub> •6H <sub>2</sub> O                  | 3.0 mM            | Fisher     | BP214    |
| Lactobionic acid                                      | 60 mM             | RPI        | L23000   |
| Taurine                                               | 20 mM             | Sigma      | T0625    |
| KH <sub>2</sub> PO <sub>4</sub>                       | 10 mM             | Fisher     | P285     |
| HEPES                                                 | 20 mM             | Sigma      | H4034    |
| Sucrose                                               | 110 mM            | EMD        | SX1075-1 |
| Fatty Acid-Free BSA                                   | 0.1%              | Calbiochem | 126575   |
| ph 7.1 with KOH                                       |                   |            |          |

**Supplemental Table S1. List of Materials**

| <b><u>Gene</u></b> | <b><u>Forward</u></b>    | <b><u>Reverse</u></b>    | <b><u>Efficiency</u></b> |
|--------------------|--------------------------|--------------------------|--------------------------|
| <i>mRplp0</i>      | GATGCCCAGGGAAGACAG       | ACAATGAAGCATTTTGGATAATCA | 88.49% - 105.15%         |
| <i>mCidea</i>      | GTCTGCAAGCAACCAAAGAA     | ATTGAGACAGCCGAGGAAGT     | 101.65% - 108.65%        |
| <i>mCox7a1</i>     | CGAAGAGGGGAGGTGACTC      | AGCCTGGGAGACCCGTAG       | 101.2% - 108.29%         |
| <i>mCycs</i>       | ACCAAATCTCCACGGTCTGTTCGG | GGTGATGCCTTTGTTCTTGTTGGC | 102.16% - 103.01%        |
| <i>mPde5a</i>      | ACAAAGGCATTGTGGGACAT     | TTGGTCAACTTCTGCATTGAA    | 98.17% - 104.14%         |
| <i>mPde9a</i>      | AGATGGACATCTTGGTCCTGA    | CGGGCATTGATCTGGTATGT     | 97.04% - 112.95%         |
| <i>mPpargc1a</i>   | CGGAAATCATATCCAACCAG     | TGAGAACCGCTAGCAAGTTTG    | 97.02% - 107.41%         |
| <i>mUcp1</i>       | GGCCTCTACGACTCAGTCCA     | TAAGCCGGCTGAGATCTTGT     | 93.57% - 111.9%          |

**Supplemental Table S2. Primer Sequences**

### Fatty acid composition of hepatic triglycerides

| Parameter                | <i>Pde9a</i> <sup>+/+</sup> - LFD |            | <i>Pde9a</i> <sup>-/-</sup> - LFD |            | <i>Pde9a</i> <sup>+/+</sup> - HFD |            | <i>Pde9a</i> <sup>-/-</sup> - HFD |            | ANOVA p-value   |             |                    |
|--------------------------|-----------------------------------|------------|-----------------------------------|------------|-----------------------------------|------------|-----------------------------------|------------|-----------------|-------------|--------------------|
|                          | <u>mean</u>                       | <u>SEM</u> | <u>mean</u>                       | <u>SEM</u> | <u>mean</u>                       | <u>SEM</u> | <u>mean</u>                       | <u>SEM</u> | <u>Genotype</u> | <u>Diet</u> | <u>Interaction</u> |
|                          | <i>g/100 g fatty acids</i>        |            |                                   |            |                                   |            |                                   |            |                 |             |                    |
| 12:0                     | 0.38                              | 0.11       | 0.28                              | 0.08       | 2.05                              | 0.37       | 2.12                              | 0.24       | 0.974           | <0.001      | 0.736              |
| 14:0                     | 1.74                              | 0.17       | 1.60                              | 0.11       | 5.05                              | 0.36       | 5.77                              | 0.38       | 0.366           | <0.001      | 0.193              |
| 16:0                     | 25.49                             | 0.76       | 27.28                             | 0.38       | 31.31                             | 0.54       | 31.22                             | 0.51       | 0.137           | <0.001      | 0.101              |
| 16:1                     | 8.80                              | 0.31       | 8.07                              | 0.46       | 7.63                              | 0.29       | 7.06                              | 0.35       | 0.081           | 0.005       | 0.825              |
| 17:0                     | 0.00                              | 0.00       | 0.00                              | 0.00       | 0.00                              | 0.00       | 0.00                              | 0.00       | NA              | NA          | NA                 |
| 18:0                     | 1.98                              | 0.23       | 2.04                              | 0.22       | 2.64                              | 0.20       | 2.76                              | 0.19       | 0.678           | 0.002       | 0.895              |
| 18:1 $\omega$ 9          | 42.00                             | 0.87       | 42.08                             | 0.78       | 36.60                             | 0.88       | 35.77                             | 0.66       | 0.642           | <0.001      | 0.574              |
| 18:1 $\omega$ 7          | 7.29                              | 0.50       | 7.59                              | 0.42       | 5.56                              | 0.47       | 5.42                              | 0.25       | 0.848           | <0.001      | 0.596              |
| 18:2                     | 10.25                             | 0.74       | 9.72                              | 0.64       | 6.63                              | 0.57       | 7.15                              | 0.54       | 0.989           | <0.001      | 0.404              |
| 18:3 $\omega$ 6          | 0.02                              | 0.02       | 0.00                              | 0.00       | 0.06                              | 0.03       | 0.11                              | 0.04       | 0.657           | 0.016       | 0.210              |
| 18:3 $\omega$ 3          | 0.49                              | 0.04       | 0.30                              | 0.06       | 0.27                              | 0.04       | 0.25                              | 0.07       | 0.083           | 0.038       | 0.184              |
| 20:3 $\omega$ 6          | 0.31*                             | 0.06       | 0.12*                             | 0.05       | 0.27                              | 0.03       | 0.25                              | 0.04       | 0.029           | 0.334       | 0.080              |
| 20:4                     | 0.66                              | 0.08       | 0.50                              | 0.11       | 0.71                              | 0.11       | 0.79                              | 0.09       | 0.716           | 0.107       | 0.237              |
| 20:5                     | 0.00                              | 0.00       | 0.00                              | 0.00       | 0.04                              | 0.02       | 0.09                              | 0.05       | 0.412           | 0.033       | 0.412              |
| 22:4 $\omega$ 6          | 0.04                              | 0.03       | 0.06                              | 0.03       | 0.19                              | 0.04       | 0.18                              | 0.03       | 0.904           | <0.001      | 0.629              |
| 22:5 $\omega$ 6          | 0.04                              | 0.03       | 0.04                              | 0.03       | 0.19                              | 0.03       | 0.21                              | 0.04       | 0.769           | <0.001      | 0.867              |
| 22:5 $\omega$ 3          | 0.01                              | 0.01       | 0.04                              | 0.03       | 0.29                              | 0.06       | 0.25                              | 0.04       | 0.935           | <0.001      | 0.414              |
| 22:6                     | 0.50                              | 0.07       | 0.27                              | 0.08       | 0.51                              | 0.11       | 0.60                              | 0.08       | 0.472           | 0.065       | 0.088              |
|                          | <i>Ratio</i>                      |            |                                   |            |                                   |            |                                   |            |                 |             |                    |
| 16:0/16:1                | 2.93                              | 0.13       | 3.50                              | 0.22       | 4.16                              | 0.14       | 4.56                              | 0.20       | 0.013           | <0.001      | 0.634              |
| 18:0/18:1                | 0.04                              | 0.005      | 0.04                              | 0.005      | 0.06                              | 0.006      | 0.07                              | 0.006      | 0.654           | <0.001      | 0.810              |
| Saturated / Unsaturated† | 0.42                              | 0.02       | 0.45                              | 0.01       | 0.70                              | 0.02       | 0.72                              | 0.02       | 0.142           | <0.001      | 0.813              |

† (12:0+14:0+15:0+16:0+17:0+18:0) / (16:1+18:1 $\omega$ 9+18:1 $\omega$ 7+18:2+18:3 $\omega$ 6+18:3 $\omega$ 3+20:3 $\omega$ 6+20:4+20:5+22:4 $\omega$ 6+22:5 $\omega$ 6+22:5 $\omega$ 3+22:6)

\* Sidak post-hoc comparison P<0.05

\*\* Sidak post-hoc comparison P<0.01

\*\*\* Sidak post-hoc comparison P<0.001

### Supplemental Table S3. Fatty acid composition of hepatic triglycerides.

Fatty acid composition of hepatic triglycerides from male *Pde9a*<sup>+/+</sup> and *Pde9a*<sup>-/-</sup>, fed either LFD or HFD. N = 10 *Pde9a*<sup>+/+</sup> LFD, 11 *Pde9a*<sup>-/-</sup> LFD, 13 *Pde9a*<sup>+/+</sup> HFD, 16 *Pde9a*<sup>-/-</sup> HFD.
